# Supplementary material
Source: PubMed Central journal article supplement (PMC3079290)
Supplement: NIHMS258813-supplement-1.pdf [file NIHMS258813-supplement-1.pdf]

Supplementary Figure 1.

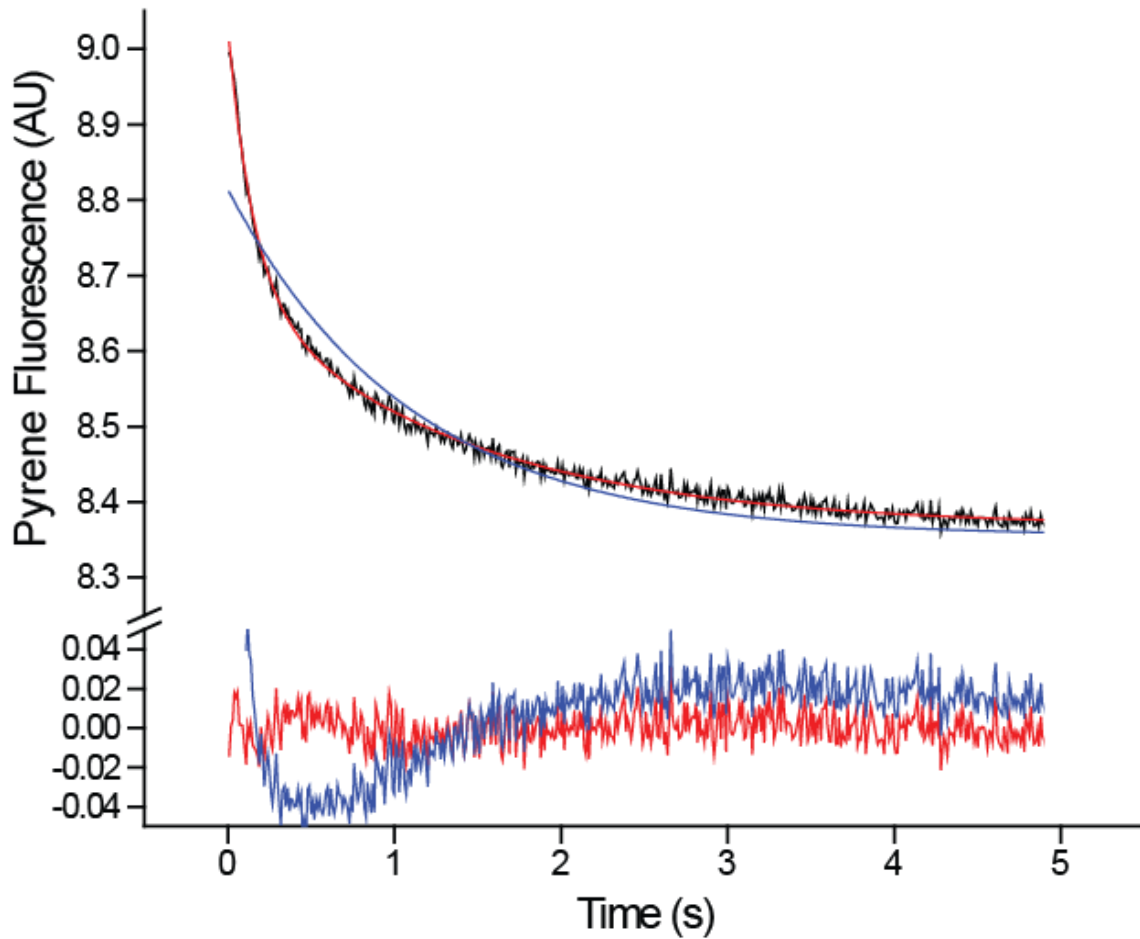

The kinetics of mRNA translocation measured by the pyrene quenching assay is best fitted by the sum of two exponentials. Pre-translocation ribosomes containing deacylated elongator tRNA<sup>Met</sup> in the P site and N-Ac-Phe-tRNA<sup>Phe</sup> in the A site were rapidly mixed with EF-G-GTP. Pyrene quenching is shown in black and the single-exponential and double-exponential fits in blue and red, respectively. The corresponding residuals obtained by subtracting the fitted curves from the raw data are shown at the bottom.
